1 **Endogamy and high prevalence of deleterious mutations in India: evidence**  
2 **from strong founder events**

3 Pratheusa Machha<sup>1,2</sup>, Amirtha Gopalan<sup>3,4</sup>, Yamini Elangovan<sup>5</sup>, Sarath Chandra Mouli Veeravalli<sup>3</sup>,  
4 Divya Tej Sowpati<sup>1,2</sup>, Kumarasamy Thangaraj<sup>1,2\*</sup>

6 <sup>1</sup>CSIR-Centre for Cellular and Molecular Biology, Hyderabad, Telangana - 500007, India

7 <sup>2</sup>Academy of Scientific and Innovative Research (AcSIR), Ghaziabad - 201002, India

8 <sup>3</sup>Department of Rheumatology and Clinical Immunology, Krishna Institute of Medical Sciences,  
9 Secunderabad, Telangana - 500003, India

10 <sup>4</sup>Present address : Department of Rheumatology and Clinical Immunology, Nizam's Institute of  
11 Medical Sciences, Hyderabad, Telangana - 500082, India

12 <sup>5</sup>Department of Biotechnology, Bharathidasan University, Tiruchirapalli, Tamil Nadu - 620024,  
13 India

14

15 \*Correspondence to

16 K. Thangaraj

17 CSIR-Centre for Cellular and Molecular Biology

18 Uppal Road, Hyderabad

19 India – 500007

20 Email: [thangs@ccmb.res.in](mailto:thangs@ccmb.res.in)

21 Tel: +91-40-27192634

22

## 23 **Abstract**

24 Founder events influence recessive diseases in highly endogamous populations. Several Indian  
25 populations have experienced significant founder events and maintained strict endogamy.  
26 Genomic studies in Indian populations often lack in addressing clinical implications of these  
27 phenomena. We performed whole-exome sequencing of 281 individuals from four South Indian  
28 groups to evaluate population-specific disease causing mutations associated with founder events.  
29 Our study revealed a high inbreeding rate of 59% across the groups. We identified ~29.2% of the  
30 variants to be exclusive to a single population and uncovered 1,284 novel exonic variants,  
31 underscoring the genetic underrepresentation of Indian populations. Among these, 23 predicted  
32 as deleterious were found in heterozygous state, suggesting they may be pathogenic in a  
33 homozygous state and are common in the endogamous groups. Approximately 40-68% of the  
34 identified pathogenic variants showed significantly higher occurrence rates. Pharmacogenomic  
35 analysis revealed distinct allele frequencies in CYP450 and non-CYP450 gene variants,  
36 highlighting heterogeneous drug responses and associated risks. We report a high prevalence of  
37 ankylosing spondylitis in Reddys, linked to *HLA-B\*27:04* allele and strong founder effect. Our  
38 findings emphasize the need for expanded genomic research in understudied Indian populations  
39 to elucidate disease risk and medical profiles, eventually aiming towards precision medicine and  
40 mitigating disease burden.

41

## 42 **Keywords**

43 Founder event, Endogamy, Novel variants, Runs of Homozygosity, Pharmacogenomics

44

45

46

47

48

49

## 50 Introduction

51 India is a land of extraordinary human diversity in terms of cultural, social and religious  
52 practices, with over four thousand anthropologically well-defined population groups, who speak  
53 more than 300 different languages. Majority of the Indian populations practice strict endogamy,  
54 resulting in substantial barriers to gene flow. Consanguinity, i.e. union between close relatives is  
55 highly pervasive in Southern India<sup>1</sup>. The rich genetic diversity within these largely endogamous  
56 groups, underscores the need to increase the Indian ethnic representation in genetic data, crucial  
57 for advancing global precision medicine. Unfortunately, there exists a significant disparity in the  
58 inclusion of the non-European population in genomic studies. Capturing the genetic diversity of  
59 these underrepresented communities can address the existing disparities improving disease risk  
60 predictions, origin and early detection, diagnosis, clinical care, and precision medicine.

61 Founder events and population bottlenecks also shape the genetic constitution of Indian  
62 populations. Founder events occur when a new population is established by a small group of  
63 individuals separating from the ancestral population. This leads to reduced genetic diversity and  
64 distinctive allele frequency patterns, often resulting in a higher prevalence of rare recessive  
65 diseases<sup>2</sup>. Due to founder events, deleterious variations persist, more so when compounded by  
66 inbreeding practices. Such populations are valuable for examining how evolutionary processes  
67 influence disease genetics and evolution.

68 The small fraction of genetic variants that are not shared among populations, may also define  
69 their distinct metabolic phenotypes. Pharmacogenomics, which studies the impact of genetic  
70 makeup on drug response, is a promising avenue for personalized medicine. There are notable  
71 inter- and intra-ethnic differences in genetic variants associated with drug absorption,  
72 distribution, metabolism, and elimination (ADME)<sup>3</sup>. For example, inconsistent responses to 5-  
73 Fluorouracil among South Asian ethnic populations are attributable to DPYD gene variations<sup>4</sup>.  
74 However, most pharmacogenomic studies focus on European subjects, leading to a Eurocentric  
75 bias in drug dosing recommendations. Although limited studies exist profiling gene-drug  
76 interactions within India's inter- and intra-ethnic diversity, the vast cultural diversity necessitates  
77 multiple frameworks.

78 In our previous study<sup>5</sup>, we identified 81 unique South Asian groups that exhibit stronger founder  
79 events than the Finns and Ashkenazi Jews, both known for a high incidence of recessive diseases  
80 linked to founder events. The strength of these founder events was quantified by analyzing the  
81 distribution of identity-by-descent (IBD) segments, which are stretches of genomic regions  
82 shared between individuals inherited from a common ancestor. While occasional reports mention  
83 specific rare diseases in select groups, comprehensive studies exploring the genetic composition  
84 and the potential for harboring deleterious variations predisposing these populations to certain  
85 diseases are lacking. In our present study, we performed an extensive interrogation of 281 high  
86 coverage whole exome sequences obtained from individuals belonging to four anthropologically  
87 distinct populations of India, each with a high IBD score, to (i) assess their levels of inbreeding  
88 (ii) identify the novel/population-specific and pathogenic variants (iii) estimate the distribution  
89 of pathogenic variants that might render populations-specific disorders and (iv) evaluate the  
90 genomic variants that affect drug metabolism in these groups. Further, in our findings, we reveal  
91 a widespread presence of Ankylosing Spondylitis (AS) in one of our study populations. We  
92 believe our study is one of the few that thoroughly explores the genetic landscape of Indian  
93 populations. This work marks an important step toward understanding Indian genetic diversity  
94 and has significant implications for the development of personalized medicine and public health  
95 strategies.

## 96 **Results**

### 97 **Study populations and sequencing**

98 Whole exome sequencing data was generated for all the collected samples from the four selected  
99 populations (Kalingas, Kallars, Reddys and Yadavs) of southern India, reported to have strong  
100 founder events<sup>5</sup>. We generated a final call set comprising of a total of 281 individual sequences  
101 across the four groups, inferred to be unrelated to the second degree. The analysis of the whole-  
102 exome data across the four populations demonstrated high-performance sequencing, achieving  
103 an average aligned read depth of approximately 99X in the target regions. The dataset was  
104 filtered using various parameters, including minimum read depth, proportion of missing data,  
105 and Phred quality scores, resulting in a high-confidence set of 140,921 variants across the four  
106 groups.

## 107 **Inbreeding coefficient reveals high endogamy**

108 Inbreeding and consanguinity is a common practice in several ethnic groups in South Asia<sup>6</sup>. To  
109 understand the nature of inbreeding in our populations, we estimated the inbreeding coefficients  
110 for each individual and also the genealogical relationship between parents. Across populations,  
111 around 59% of the individuals had a positive inbreeding coefficient (56.1% in Kalinga, 87.5% in  
112 Kallar, 56% in Reddy and 38.4% in Yadavs). Mating type inference as depicted in Figure 1  
113 showed that the Yadavs had comparatively more outbred individuals (61.6%), whereas the other  
114 three populations had a lower proportion of individuals whose parents are unrelated - 43.8%,  
115 12.5% and 44% for Kalinga, Kallar and Reddy, respectively (Table 1). We found no individuals  
116 exhibiting avuncular relationships between their parents.

## 117 **Runs of homozygosity**

118 Founder events, endogamy and consanguinity contribute to higher homozygosity in populations,  
119 with characteristic differences in length and number of homozygous tracts. Their sizes and  
120 numbers are informative; with the shorter ones reflecting autozygosity (IBD) and longer  
121 segments being suggestive of recent inbreeding events. We used runs of homozygosity (ROHs),  
122 *i.e.*, contiguous genomic regions with identical maternal and paternal copies to elucidate the  
123 nature of inbreeding in the population groups. For our study, ROHs were grouped into five  
124 distinct classes - class A (1 - 2Mb), class B (2 - 4Mb), class C (4 - 8Mb), class D (8-16Mb) and  
125 class E (> 16 Mb) as depicted in Figure 2a (Supplementary Table 1). We detected ROHs in all 50  
126 individuals from the Reddy group, 70 out of 73 from the Kalinga group, 71 out of 72 from the  
127 Kallar group, and 65 out of 86 from the Yadav group. Considering homozygous tracts exceeding  
128 1.0 Mb in length revealed a wide range of values in the individuals, varying between a minimum  
129 of just 1 ROH tract to a maximum of 46 tracts through the genome. The ROH statistics across  
130 the groups are given in Table 2. The most extreme case was an individual from the Kalinga  
131 group, who had approximately 250.5 Mb of homozygous regions (Fig. 2b), covering about 7.8%  
132 of the autosomal genome, as can be seen in Figure 2c.

133 Next, we attempted to see if the prevalence of ROH segments of a particular class correlates with  
134 the age of founder events. In all four groups, individuals exhibited larger proportions of  
135 homozygous tracts falling in class B and C (Fig. 2a). The occurrence of class C ROH segments

136 indicates a shared ancestor approximately 12 generations ago. This observation partially  
137 coincides with the established timing of founder events documented for the groups in previous  
138 study<sup>7</sup>, wherein, the authors report the founder event to have taken place around 9 - 11 gBP  
139 (generations Before Present) in Kallars, 6 - 15 gBP in the Reddys and 4 - 7 gBP in the Yadav  
140 group. The Kalinga group was not a part of their study. While using a threshold of 20cM, we  
141 observed a major fraction (> 50%) of the homozygosity in each individual arising from the  
142 smaller segments, i.e < 8 cM. Also, the proportion of the autosomal genome occupied by the  
143 cumulative length of the smaller ROH tracts in the range of 1 - 8 Mb (class A - C) was higher  
144 than that occupied by longer tracts > 8.0 Mb (class D & E) for almost all the individuals in all  
145 four population groups, providing additional affirmation on the occurrence of founder events in  
146 these groups (Fig. 2c). The analysis also revealed that ~ 38% of the samples display at least one  
147 ROH segment exceeding 8Mb. The equally higher prevalence of longer segments (> 8.0 Mb)  
148 aligns with the existing practice of endogamy and of consanguineous unions in the populations  
149 of South India. Both the founder events and inbreeding are observed to play a pivotal role in  
150 shaping the homozygosity in these groups.

### 151 **Inter-population comparison**

152 Principal Component Analysis (PCA) was performed by combining genetic data of the 281  
153 individuals with 1000 Genome phase 3 dataset (1kG\_phase3). As expected, we observed that the  
154 groups aligned closely to the South Asian samples (Supplementary Fig. 1). In inter-population  
155 comparison, we found that around ~ 29.2% of the total variants across all the four groups were  
156 found in just a single individual or population (population-specific), while 39.7% variants were  
157 shared by all the four populations (Fig. 3). At most, only 6.7% of variants are shared among  
158 three populations (Kalinga, Kallar, and Yadav), and 6.6% are shared between two populations  
159 (Kallar and Yadav). This highlights the distinct genetic constitution of the four populations.

### 160 **Novel variants**

161 Post-filtering for each population separately, we detected a total of 73,599 high quality variants  
162 in Kalinga, 80,384 in Kallar, 79,255 in Reddy and 82,761 in Yadav (Supplementary Fig. 2a) in  
163 the exome data. Comparing these variants with nine widely used and publicly available  
164 population datasets (see methods), we segregated known and novel variants in each population

165 (Supplementary Table 2). We identified 1,284 novel genetic variants, encompassing variants in  
166 the coding, UTR and splice regions, across the four groups. Population-wise, in Reddys, 526  
167 novel variants (0.66% of the total variant set) were identified, while Kalingas had 472 exonic  
168 variants (0.64%) to be novel. Kallars presented 205 novel variants, constituting 0.26% of the  
169 total, followed by Yadavs with just 86 of them, accounting for 0.1% of the total (Supplementary  
170 Fig. 2b, Supplementary Fig. 3). Importantly, a comparison among different population groups  
171 revealed that the identified novel variants are exclusive to their respective group, with only a  
172 maximum of 4 novel variants being shared between the Yadav and the Kalinga groups, while  
173 only one novel variant is common among the Kalinga and the Reddys. Further, the asymmetrical  
174 distribution of these novel variants can be characterized as an enrichment of rare and missense  
175 variants, as the majority of the novel variants having a MAF (Minor Allele Frequency) between  
176 2-5 and the number decreasing with increase in the MAF (Supplementary Table 2).

177 Given that we observe an excess of rare novel variants at functional sites in our populations, we  
178 consider the effect of these variants on fitness and selection using different approaches. After  
179 annotation with Annovar and Ensembl VEP against different databases, these variants were  
180 analyzed for their potential consequences (see methods). We detected a limited number of  
181 potentially deleterious novel variants - 7 in Kalingas, 4 in Kallars, 9 in Reddy and 3 in the  
182 Yadavs. These are either non-synonymous variants or are present in the splice sites. An  
183 important aspect to mark here is that none of the individuals display homozygosity for the novel  
184 potentially deleterious genetic variants (Table 3). We then predicted the impact of these variants  
185 on the stability of the protein. Of the 17 genes with missense variants, 15 of them displayed a  
186 destabilizing/unfavorable effect on the protein, while two of them in the *ACOT8* and the  
187 *MAP4K1* genes had a stabilizing/favorable effect.

### 188 **Known variants and enrichment analysis**

189 For the known variants that were annotated as pathogenic/likely pathogenic in ClinVar and  
190 thereby, referred to as “known deleterious” variants were majorly frameshift indels, stopgain or  
191 non-synonymous variants (Supplementary Fig. 4). We annotated 21 variants to be deleterious in  
192 Kallars, 30 each in the Kalingas and Reddys and 19 in the Yadavs (Supplementary Table 3). In  
193 comparison with the reported allele frequencies in the 1kG\_phase3 dataset, a high proportion of  
194 these variants exhibited significantly ( $p_{adj} < 0.05$ ) higher AF, ranging between ~33% in Kallars

195 and Kalingas to ~42% in Yadavs. Similar trends were also observed on comparisons with the  
196 GenomeAsia100k dataset (GAs100k) as depicted in Figure 4a. An inter-group comparison gave  
197 us six genes that are hosting pathogenic/likely pathogenic variants with a significant MAF in two  
198 or more groups (Supplementary Fig. 5). Similarly for the “known potentially deleterious”  
199 (predicted) variants, notable proportions were observed to be significantly ( $p_{adj} < 0.05$ ) enriched  
200 in the populations : ranging from approximately 39% in Yadavs to 47% in the Reddys, and  
201 around 65% in the Yadav and Kallar groups to 66% in the other two, on comparison with the  
202 AFs reported in the 1kG\_phase3 and GAs100k datasets, respectively (Fig. 4b).

203 An over-representation analysis was performed to ascertain whether the high occurrence of  
204 founder variants in each group are enriched in specific pathways, molecular-functions, or  
205 cellular-components beyond what would be anticipated by random chance. The significant  
206 enriched terms ( $FDR < 0.05$ ) resulting from the Gene Ontology resource analysis in CPDB  
207 primarily included hydrolase activity, superoxide dismutase activity, t-UTP complex cellular  
208 component, along with others (Supplementary Table 4).

## 209 **Pharmacogenomic diversity**

210 To delve into the pharmacogenomic profile of the study populations, we considered the  
211 pharmacogenetically important alleles listed in Tier1 of the Clinical Pharmacogenetics  
212 Implementation Consortium (CPIC) drug-gene pairs, along with the Pharmacogenomics  
213 KnowledgeBase (PharmGKB). The analysis was further classified into three different categories  
214 of genes - cytochrome-P450 (CYP450) genes, non-CYP450 genes and the Human Leukocyte  
215 Antigen (HLA) genes. We genotyped the first two groups of genes with the PyPGx<sup>8</sup> tool. Herein,  
216 we observed substantial diversity within the CYP450 genes (Fig. 5a, 5b) - *CYP2B6*, *CYP2C19*,  
217 *CYP2C9* and *CYP2D6*. A carrier frequency exceeding 1% for several of the Tier1  
218 pharmacovariants within these genes was observed across all the four groups (Table 4,  
219 Supplementary Table 5). However, for a majority of them, the AFs remain comparable to those  
220 documented for the South Asians, available on the CPIC website (Supplementary Table 6). For  
221 instance, *CYP2C9\*3* had similar high allele frequencies as reported in the Indian populations<sup>9</sup>.  
222 The notable deviations were the *CYP2C19\*3* having an AF of 11.11% and 15.34% in Kallars  
223 and Yadavs (compared to 2.73% in SAS), *CYP2D6\*3* exhibited an AF of 13.7% in Kalingas and  
224 20.45% in Yadavs (1.01% reported in SAS); and *CYP2D6\*4* that showed an AF of 23.29% and



225 20.83% in Kalingas and Kallars, respectively (8.89% in SAS). Kallars had a representation of  
226 ~6% UM along with ~26% RM and ~15% PM individuals for the *CYP2C19* gene that is  
227 involved in the metabolism of several xenobiotics, including some proton pump inhibitors and  
228 antiepileptic drugs. An occurrence of *CYP3A5*\*3 (A6986G) allele at an AF of ~0.4, similar to the  
229 reported AF allele frequency outlined for South Indians<sup>10</sup> was observed in the Kalingas. The  
230 variant has been assigned “No function” by CPIC for drugs like tacrolimus, eventually resulting  
231 in inter-individual differences - PM at ~34%, IM at ~51% and NM at ~15%. The other three  
232 groups consist of samples with only NM and IM phenotypes.

233 Secondly, for the non-CYP450 genes (Fig. 5c, 5d), we observed a high number of PM  
234 individuals for the drug atazanavir in only Kalingas. A total of 12 individuals (~17%) who are  
235 homozygous for *UGT1A1*\*80+\*28 are possibly at an increased risk for developing atazanavir-  
236 related hyperbilirubinemia<sup>11</sup>. We see a significant proportion of individuals with rs149056  
237 variant in *SLCO1B1* gene, associated with statin-induced myopathy due to decreased efficacy in  
238 uptake of statins (mostly simvastatin and atorvastatin), in all groups, except the Reddys. For the  
239 identified Tier1 variants in our study groups, the majority exhibited an AF akin to those recorded  
240 for the South Asians. However, notable exceptions include rs2231142 in the *ABCG2* gene,  
241 associated with rosuvastatin pharmacokinetics<sup>12</sup> demonstrating a significantly higher AF  
242 (FDR<0.05) in the Kalingas; rs3918290 and rs2297595 associated with DPYD deficiency-linked  
243 fluorouracil toxicity<sup>13</sup> was found to be significantly enriched (FDR<0.05) in the Reddy and the  
244 Yadav groups, respectively. Additionally, rs2108622 (V433M) causing reduced *CYP42* activity  
245 and leading to the requirement of increased warfarin dosage<sup>14</sup> displayed significance (FDR<0.05)  
246 in the Yadav group.

247 Thirdly, among the highly polymorphic HLA genes, we noted that Kallar, Kalinga and Yadav  
248 groups exhibited greater diversity in the *HLA-B* gene as compared to the *HLA-A* gene, while  
249 Reddys showed nearly similar proportion of allelic diversity for both the genes (as depicted in  
250 Supplementary Fig. 6). In general, we noted a considerable prevalence of approximately 31% of  
251 our study subjects carrying a *HLA-B* genotype associated with life-threatening drug toxicities  
252 including allopurinol-induced (*HLA-B*\*58:01)<sup>15</sup> or carbamazepine-induced (*HLA-B*\*15:02)  
253 Stevens-Johnson syndrome/toxic epidermal necrolysis (SJS/TEN)<sup>16</sup> and fatal hypersensitivity  
254 reactions to abacavir (*HLA-B*\*57:01) in people with HIV infections<sup>17</sup>.

## 255 **Ankylosing Spondylitis (AS) in the Reddy population**

256 We note a marked prevalence of the *HLA-B\*27:04* genotype, accounting for 13% allele  
257 frequency within the Reddy samples. *HLA-B27*, a member of the major histocompatibility class I  
258 (MHC), is well established for its association with Ankylosing Spondylitis (AS) and in India,  
259 AS cases typically exhibit HLA-B27 positivity in the range of 80 - 90%<sup>18</sup>. Through clinical  
260 collaboration with the Krishna Institute of Medical Sciences (KIMS), Hyderabad, Telangana, we  
261 successfully identified a significant proportion (54%, 7 out of 13 heterozygotes) of the genotype  
262 carriers testing positive for AS. We also observed that around ~4.72% of diagnosed AS cases in  
263 the hospital records belong to the Reddy community, with a notable concentration of patients  
264 coming from the area of our sample collection and the adjacent villages. Furthermore, among the  
265 seven AS-positives from our dataset, two individuals have parents classifying as unrelated to  
266 each other, suggesting that besides consanguineous unions, founder events can also play a  
267 substantial role in certain diseases in Indian populations.

268 AS, a polygenic disorder, is one of the most common forms of inflammatory arthritis,  
269 predominantly affecting the axial skeleton and sometimes involving various other organs like the  
270 eyes, gastrointestinal tract; significantly diminishing the quality of life for those affected. Hence,  
271 we investigate the role of the second most common gene, *ERAP1* (Endoplasmic Reticulum  
272 Aminopeptidase 1), known to be associated with AS, in our sample set. We identified variants in  
273 the *ERAP1* gene and attempted to delineate the haplotypes in the AS-positive samples, focusing  
274 on eight widely studied variant sites. Alongside the wild type, we observed the prevalence of  
275 four different haplotypes - EPIMKDRE, EPIVKNQE, EPMMKDRE and ERIMKDRE (Table 5).

## 276 **Methods**

### 277 **Study subjects and data generation**

278 Objective of this study was to discern the genetic variants with potential implications in clinical  
279 phenotypes and diseases in populations with strong founder events. We selected four  
280 populations, which were reported to have high IBD scores and also have a huge census size of  
281 above or nearly 1 million individuals<sup>5</sup>. For the study, we collected samples of 101 individuals  
282 from the Kalinga population of Andhra Pradesh, 92 from the Kallars of Tamil Nadu, 66 from the  
283 Reddy group of Andhra Pradesh, and 94 from the Yadavs of Pondicherry (now Puducherry). To

284 the best of our knowledge, all participants were in good health. Blood samples were collected  
285 from the volunteers and DNA was isolated using the phenol-chloroform method<sup>19</sup>. Whole exome  
286 sequencing libraries were prepared using the TruSeq Exome library preparation kit and  
287 sequencing was performed on the Illumina Novaseq 6000. The paired-end sequencing was done  
288 to target a vertical coverage of 100X.

289 To have a whole genome representation for our study on clinically relevant variants, we  
290 genotyped a subset of 96 individuals (24 from each population group) for 700,604 variant sites  
291 on Infinium Global Screening Array-Multi Disease (GSA-MD v3.0) array. From each of the  
292 population, 24 random unrelated samples were selected and processed for GSA. This array was  
293 chosen for its relevant and curated clinical research markers from ClinVar and multi-ethnic  
294 exonic content from ExAC database or other published GWAS studies.

### 295 **Variant calling, filtering and quality metrics**

296 Following basic quality control checks, adapter trimming was performed using Cutadapt v2.8.  
297 Alignment of the sequencing data to the human reference genome (build GRCh38) was  
298 performed using DRAGEN v3.9.3 to generate individual GVCF (genomic variant call format)  
299 files followed by joint genotyping to generate a single multi-sample VCF (variant call format)  
300 file for each population groups. An additional step of Variant recalibration was carried out using  
301 Genome Analysis Toolkit (GATK v4.4.0.0) by standard quality filters. We achieved a mean  
302 coverage of ~99X on target regions for all the samples (Supplementary Table 8).

303 To exclude subjects with second degree relatedness, the kinship estimates were called using  
304 PLINK 2.0 - `KING` and removed one sample from each pair having a kinship value > 0.0884.  
305 Further, low quality samples with less than 50X coverage and more than 50% missingness were  
306 removed. Post filtering of the samples, we have a final call set consisting of a total of 281  
307 individual sequences (Kalinga-73, Kallar-72, Reddy-50 and Yadav-86) healthy individuals,  
308 inferred to be unrelated to the second degree. Stringent variant filtering strategies were applied  
309 for each of the groups separately to produce a high quality dataset. We used VCFtools v0.1.16 to  
310 exclude variants that were (i) non-biallelic (ii) genotyped in less than 95% of the samples (iii)  
311 Genotype Quality (GQ) less than 30 (iv) minimum read depth (minDP) less than 8 (v) presented  
312 a Hardy Weinberg test value  $p < 10^{-6}$  and (vi) Minor Allele Frequency (MAF) less than 0.02.

313 Post filtering, to assess the probability of false positives, the transition-transversion (ts/tv) and  
314 the concordance rate with dbSNP was estimated. The values are in accordance with the expected  
315 for exome studies. Further, to validate that the selected groups are non-overlapping, we  
316 computed the Weir and Cockerham  $F_{st}$  estimates between the groups (Supplementary Table 8).  
317 We considered pairs with weighted  $F_{st} < 0.004$  to be overlapping<sup>5</sup>. However, we do not find any  
318 overlap between the groups suggesting that they do not intermarry. Analyzing the exome data for  
319 each population separately, we detected a total of 73,599 high quality variants in Kalinga, 80,384  
320 in Kallar, 79,255 in Reddy and 82,761 in Yadav (Supplementary Fig. 1a).

321 For the GSA dataset, we conducted sample filtering to eliminate samples with a missingness  
322 exceeding 2% and those with any sex ambiguity. However, this step did not result in any sample  
323 loss. In the subsequent variant quality filtering steps, we removed duplicate variant sites and  
324 variants with less than 95% genotype rate across all samples. The genotyping rate for the final  
325 GSA dataset was ~0.99 (Supplementary Table 7).

## 326 **Variant annotation**

327 The post-QC exome dataset as well as the GSA data for each population was annotated both by  
328 Ensembl Variant Effect Predictor (VEP v102) and Annovar.

## 329 **Inbreeding and mapping regions of homozygosity**

330 To detect the inbred individuals and infer the parental mating type, we used the FSuite v.1.0.4  
331 pipeline<sup>20</sup>. It involves a method of estimating the individual inbreeding coefficients, obtained as  
332 F-median. We used the filtered exome files to generate 100 (default) random submaps. The  
333 proportions of the outbred and inbred - first cousins, second cousins and double-first cousins  
334 were calculated for each group.

335 The ROH segments were called from the exome dataset pruned for LD using PLINK; sliding  
336 window = 50kb, step size = 5 Single Nucleotide Polymorphisms (SNPs) and  $r^2$  threshold = 0.5.  
337 The homozygous regions were called for each sample with PLINK v1.9, the parameters  
338 optimized for WES<sup>21</sup>. This involves a sliding window of 50kb without any heterozygous sites,  
339 while keeping the rest of plink parameters at default (plink options : --homozyg-snp 50,--  
340 homozyg-window-het 0). Only ROH with a length of 1Mb were selected. The ROH segments

341 were binned into five-length classes : 1-2Mb, 2-4Mb, 4-8Mb, 8-16Mb and >16Mb, identified as  
342 class A-E, respectively. Each ROH length class represents the estimated number of generations  
343 from a common ancestor, calculated as  $E(L_{IBD-H|gcA}) = \frac{100}{2gcA}$ , where  $E(L_{IBD-H|gcA})$  is the length of  
344 the ROH segment and  $gcA$  stands for the number of generations from the common ancestor<sup>22</sup>.  
345 Based on the assumption that 1cM equals 1Mb, we could estimate that the ROH classes from  
346 class A to class E, date back to approximately 50, 20, 12.5, 6 and 3 generations ago. The number  
347 of ROH segments, total length of these segments and the mean ROH length for each individual  
348 class was calculated.

### 349 **Population variant analysis**

350 The final filtered variant call set for each of the population groups was categorized into rare  
351 (MAF 2-5), common (MAF 5-25) and very common (MAF >25) (Supplementary Table 2). Due  
352 to small sample size for the groups, we had filtered out the variants with MAF < 2 to achieve a  
353 high-confidence variant set.

354 To identify novel variants, we compared the identified and filtered variants from each group  
355 against nine known datasets namely - 1kG\_phase3<sup>23</sup>, GAs100k<sup>24</sup>, gnomAD exome dataset,  
356 dbSNP151, the draft human pangenome<sup>25</sup>, ClinVar v.20221231, TopMed freeze 8  
357 (<https://bravo.sph.umich.edu/freeze8/hg38/downloads>), and two Indian-specific datasets - one of  
358 the Andamanese<sup>26</sup> and the second a collection of 836 refined Indian clinical research exome  
359 dataset<sup>27</sup>. To check if a variant is shared in a database, we matched the chromosome, position and  
360 both the REF and ALT alleles. The shared variants are referred to as the Known variants and the  
361 rest are called the Private variants with respect to the dataset of comparison. Finally, we made a  
362 final collection of variants that are totally unique to the populations in study and call them the  
363 Novel variants.

### 364 **Characterization and functional enrichment of the known and novel variants**

365 Novel potentially deleterious variants - We put two different criteria to classify any variant to be  
366 putatively deleterious. One, from the VEP annotated vcf files, we filtered for the variants that  
367 were deemed to be of High Impact by VEP (such as frameshift, splice-site, stop-gain) and High  
368 Confidence (HC) by the Loss of Function (LoF) plugin. Two, we looked separately for *in silico*

369 predictions by SIFT<sup>28</sup>, PolyPhen2<sup>29</sup>, and CADD v1.6<sup>30</sup>. Any variant annotated by the first two to  
370 be “deleterious” and “probably\_damaging”, respectively; and having a CADD score above 30  
371 (i.e the variant lies in the top 0.1 of deleterious variants in the human genome) were taken into  
372 consideration. Finally, the variants that pass either of our two criteria were classified to be  
373 potentially deleterious, in this case Novel potentially deleterious variants.

374 Known deleterious variants - These are the known variants for each population group that are  
375 annotated as “pathogenic/likely pathogenic” by ClinVar in the Annovar annotated files.

376 Known potentially deleterious variants - The known variants underwent a similar filtering  
377 strategy as for the novel potentially deleterious variants. Additionally under our second criterion,  
378 along with SIFT, PolyPhen and CADD, the known genomic variants were also annotated by two  
379 other *in silico* tools and those confirmed to be “deleterious” by LRT<sup>31</sup> and “disease causing” by  
380 MutationTaster<sup>32</sup>; were considered to be potentially deleterious.

381 For the known deleterious and potentially deleterious variants, the AF (allele frequency) was  
382 compared against 1kG\_phase3 and GAs100k datasets for significance by performing Fisher’s  
383 exact test followed by Benjamini-Hochberg correction for FDR (False Discovery Rate) to  
384 account for multiple testing. The ones with  $p_{adj} < 0.05$  are considered to be significant.

385 An over-representation analysis for the biological pathways of the genes mapped by the known  
386 deleterious/potentially deleterious variants was performed in the ConsensusPathDB program  
387 (<http://cpdb.molgen.mpg.de/>). As sensitivity analysis, we are calling a known variant to be a  
388 founder variant only if present in a significantly higher allele frequency ( $p_{adj} < 0.05$ ) in the  
389 population (both compared to 1kG\_phase3 and GAs100k dataset). The genes with significant  
390 known/potentially deleterious variants were given as input to the ConsensusPathDB (CPDB)  
391 program. The selected genes were the target and the complete list of genes present in the exome  
392 target sites was uploaded as reference, while selecting the GO pathway option. We incorporated  
393 a significance criteria of  $FDR < 0.05$  in selecting the GO terms.

#### 394 **Effect of novel potentially deleterious variants on protein stability**

395 Following the *in silico* prediction of novel variants, we proceeded to assess the potential impact  
396 of these predicted novel deleterious variants on protein stability. This was done with the help of

397 I-Mutant 2.0<sup>33</sup>, a Support Vector Machine (SVM) based tool that predicts the impact of single  
398 point mutations on the protein stability, given the protein structure or sequence. For each  
399 missense novel deleterious variant, we determined whether it exhibited a destabilizing effect  
400 (negative  $\Delta\Delta G$ ) or a stabilizing effect (positive  $\Delta\Delta G$ ) on the protein under standard  
401 conditions of pH 7 and room temperature. Here,  $\Delta\Delta G$  is the predicted free energy difference  
402 and expressed as:  $\Delta\Delta G = \Delta G_{\text{mutant}} - \Delta G_{\text{wild-type}}$ .

### 403 **Pharmacogenetics and *ERAP1* haplotype estimation**

404 Pharmacogenomic variants associated with specific gene-drug responses were mined from the  
405 PharmGKB database at <https://www.pharmgkb.org/> with clinical annotation of level 1A or 1B,  
406 since these are the variants demonstrating the highest evidence for actionable clinical  
407 implications of gene-drug associations. Allelic and the gene phenotype interpretations for the star  
408 allele genes (both cyt P450 and non-cyt P450 genes) was done using PyPGx v0.20.0<sup>8</sup> tool. Using  
409 the genomic data, the PyPGx tool predicts the PGx genotypes and phenotypes, namely Normal  
410 Metabolizer (NM), Intermediate Metabolizer (IM), Poor Metabolizer (PM), Rapid Metabolizer  
411 (RM) and Ultrarapid Metabolizer (UM). For the HLA-A and HLA-B genes, xHLA v.1.2<sup>34</sup> tool  
412 was used which utilizes the aligned bam files as input. Further, we computed the allele  
413 frequencies for the actionable genetic variants and their corresponding phenotypes by analyzing  
414 the output from the above two tools.

415 To compute the protein haplotypes of *ERAP1* gene, we constructed the haplotypes as a  
416 combination of eight amino acids at the coding SNP positions - rs3734016 (E56K), rs26653  
417 (R127P), rs26618 (I276M), rs2287987 (M349V), rs30187 (K528R), rs10050860 (D575N),  
418 rs17482078 (R725Q) and rs27044 (Q730E), the haplotype represented in the same order as the  
419 sites mentioned here. These sites were selected as they are the most commonly reported variant  
420 sites in the gene and are also the ones mostly studied in connection with AS.

### 421 **Discussion**

422 Founder events and population bottlenecks significantly influence genetic diversity and disease  
423 risk profiles in contemporary populations. These events cause allelic frequency shifts that have  
424 resulted in prominent genetic discoveries, notably in the Ashkenazi, Finnish, Amish, Icelandic

425 and others. Endogamy/consanguinity contribute to increased homozygosity beyond what random  
426 mating would predict. Higher incidences of recessive disorders are typically found in founder as  
427 well as endogamous communities. In our previous study on South Asian populations<sup>5</sup>, we  
428 identified 81 out of 263 South Asian groups that experienced founder events stronger than the  
429 archetypal Finnish and Ashkenazi Jewish populations. India is characterized by diverse  
430 populations practicing strict endogamy. However, comprehensive studies on the disease risks  
431 and pharmacogenomic profiles of the Indian populations are scant.

432 Our current study reports high levels of endogamy in four Indian populations previously  
433 identified as having strong founder events. We depict a high percentage of ~59% of the total  
434 individuals to be inbred across the four groups, and present both recent and ancestral parental  
435 relatedness as compelling evidence to the prevailing levels of genome wide homozygosity in the  
436 subjects. Individuals born from closely related parents often carry genetic burden, with several  
437 stretches of DNA inherited from a common ancestor. These sequences characterized by  
438 continuous homozygous sites, ROHs, increase the likelihood of expressing deleterious  
439 mutations<sup>35</sup>. At the population level, inbreeding decreases genetic variability, with the length of  
440 ROH regions reflecting the number of generations since the inbreeding event. Our findings show  
441 high frequencies of both short and long ROH tracts, indicating a combination of founder events  
442 and high endogamy rates in the groups. These insights have significant implications for assessing  
443 the long-term effects of inbreeding on human health and utilizing ROHs to identify loci  
444 susceptible to recessive disorders.

445 We identified clinically significant genetic variants in both known and novel sets across the four  
446 populations. Notably, we found a large number of novel exonic variants (1,284) with a minor  
447 allele frequency (MAF) > 2%, highlighting the genetic diversity and distinctiveness of Indian  
448 populations. These novel variants are unique to their respective populations, likely a result of  
449 strict endogamy practices. Twenty three of these novel variants have been annotated through *in*  
450 *silico* analysis as potentially deleterious, impacting protein stability. Their absence in  
451 homozygous form suggests that they may be pathogenic recessive variants.

452 Given the occurrence of founder events, we anticipated a high load of deleterious variants and an  
453 increased risk of recessive diseases, similar to observations in Finns and Ashkenazi Jews. We  
454 identified several pathogenic/likely pathogenic variants and predicted many potentially



455 pathogenic/loss-of-function (pLoF) exonic variants across the four populations. Most samples  
456 were heterozygous for known pathogenic mutations, particularly for rare monogenic disorders,  
457 such as mutations in the VWF gene causing autosomal recessive Von Willebrand disease. For  
458 some genes, we found that the presence of paralogs allows for greater tolerance to loss-of-  
459 function variants<sup>36</sup>, while others are linked to disorders with variable penetrance or are  
460 influenced by additional regulatory and external factors, such as NQO1 gene variants<sup>37</sup>, which  
461 are key in breast cancer progression. Additionally, several variants showed significant deviations  
462 from their typical occurrence rates in South Asian populations.

463 Apart from the genetic disease risk, understanding diversity in the genetic variants impacting an  
464 individual's response to medications holds crucial clinical implications. There is a global  
465 emphasis to increase pharmacogenetic testing to ensure drug safety and increase drug  
466 effectiveness. Recent pharmacogenomic research has brought into light marked inter-population  
467 disparities in drug metabolism, therapeutic efficacy and safety profiles, highlighting a pressing  
468 concern<sup>38</sup>. In our work, we sought to investigate in our study groups, the variability in the  
469 prevalence of the VIP pharmacogenomic variants. We reported the presence of  
470 *UGT1A1*\*80+\*28, known for its association with Gilbert syndrome, and *CYP3A5*\*3 genetic  
471 polymorphisms only in the Kalingas. *CYP3A5*\*3/\*3 results in *CYP3A5* non-expressor,  
472 exhibiting poor clearance of the drug tacrolimus which is used to prevent post-transplantation  
473 organ rejection<sup>39</sup>. While the allelic frequency for *CYP3A5*\*3 in Kalingas stands similar to  
474 literature reported values for the south Asian populations, it is crucial to emphasize here that this  
475 uniformity does not universally apply, considering the absence of the allele in the other three  
476 groups. We observed a likewise scenario wherein the reported *CYP2C19*\*3 (a premature stop  
477 codon in exon 4) levels in both Kallars and Yadavs differs considerably from the stated  
478 frequency of 0.08 among South Indians<sup>40</sup>. Other pharmacovariant of importance is the rs2231142  
479 (421C>A) in the *ABCG2* gene, which decreases the ATPase activity of *ABCG2*, increasing  
480 rosuvastatin accumulation in the systemic circulation, a drug used for the management of  
481 dyslipidemia and coronary heart disease. Second is the rs2108622 in the *CYP4F2* gene linked to  
482 altered vitamin K<sub>1</sub> metabolism, wherein the rs2108622-T carriers require a higher warfarin dose.  
483 Furthermore, we also document the presence of rs3918290 and rs2297595 variants in the *DPYD*  
484 gene, related to severe toxicities in cancer patients treated with fluoropyrimidines like  
485 fluorouracil.

486 Our study highlights a significant prevalence of Ankylosing Spondylitis (AS) within the Reddy  
487 population, primarily linked to the *HLA-B27:04 risk allele*. AS is a highly familial disease, with  
488 *HLA-B27* contributing to 20.1% of its heritability<sup>41</sup>. While data from the Indian subcontinent is  
489 limited, *HLA-B27:04* and *HLA-B\*27:05* subtypes have been noted as highly prevalent in AS  
490 cases in South India<sup>42,43</sup>. To investigate this further, we collaborated with hospitals and found that  
491 the KIMs hospital in Hyderabad reported approximately ~140 patients to be Reddys from a total  
492 of 2,963 AS-positive cases. Notably, 28.6% (40 in 140) of these Reddy AS cases were from a  
493 particular geographical region, which includes our sample collection area and nearby regions.  
494 Further, *ERAP1*, the second most important gene known to be definitely associated with AS, is  
495 highly polymorphic and is known to exhibit genetic diversity across different ethnicities.  
496 However, the association between *ERAP1* and AS is thought to be attributable to combinations  
497 of haplotypes, affecting *ERAP1* function<sup>44</sup>. We discovered four distinct haplotypes not previously  
498 reported, despite our small sample size. These patients exhibited typical AS symptoms such as  
499 peripheral joint and lower back pain, stooped posture, and skin rashes. Studies on *ERAP1*  
500 haplotypes highlight the gene's role and its interaction with HLA genes in disease, though the  
501 prevalence and functional distinctions of specific haplotypes remain debated. The presence of  
502 *HLA-B27*, combined with a family history of AS, significantly increases the risk of developing  
503 the disease<sup>45</sup>, raising serious clinical concerns for the Reddy population due to the high incidence  
504 rate.

505 In yet another similar example of population-specific disorder, we would like to highlight the  
506 high incidence of Epidermolysis Bullosa in Kallar group from an adjacent district to our area of  
507 sample collection (unpublished work). However, we do not observe such phenotype in our Kallar  
508 samples. Both these examples underscore the prevalence of endogamy in India not only at the  
509 population level, but also at the sub-population level, within small geographical regions. Disease  
510 associated variants can gain prominence in a founder population with successive generations,  
511 more so compounded by inbreeding.

512 Our study highlights the importance of understanding the clinical and pharmacogenomic impacts  
513 of founder events and endogamy in the Indian populations. Population-specific disparities in the  
514 field are of high relevance in the context of large-scale genetic inquiries and for nuanced disease  
515 risk assessments. Our findings underscore the need for further research to validate and extend

516 these insights. We advocate for creating an accessible database categorizing genetic variations by  
517 ethnic background, facilitating precise genome scans for disease risk and drug-response-related  
518 polymorphisms. This approach aims to enable tailored treatment strategies, ensuring  
519 personalized medications based on unique genetic profiles. This could further help in  
520 development of health policies that establish guidelines for specific risk groups. This would mark  
521 a pivotal step towards eliminating pathogenic variants and reducing the occurrence of diseases in  
522 vulnerable populations.

523

#### 524 **Data availability**

525 The raw sequence data for the samples included in this study has been submitted under the  
526 BioProject ID PRJNA1112977 (to be released on manuscript publication).

#### 527 **Funding**

528 PM was supported by the DBT JRF-SRF research fellowship. KT was supported by J C Bose  
529 Fellowship from Science and Engineering Research Board (SERB), Department of Science and  
530 Technology (JCB/2019/000027).

#### 531 **Competing interests**

532 The authors declare no competing interests for this work.

#### 533 **Authors contributions**

534 PM - study design, conceptualization, methodology, sample collection, data generation, data  
535 analysis and curation, validation, visualization, writing - original draft, review and editing; AG -  
536 sample collection, clinical data curation; YE - sample collection, SCM - supervision of clinical  
537 data curation and validation; DTS - supervision, resources and visualization; KT - supervision,  
538 study design, conceptualization, validation, writing - review and editing, funding acquisition,  
539 project administration, resources and visualization.

## 540 **Ethics approval**

541 The project was carried out in accordance with the guidelines set by the Institutional Ethical  
542 Committees of the Centre for Cellular and Molecular Biology, Hyderabad, India.

## 543 **Consent to participate**

544 Informed written consent was obtained from all the participating volunteers included in the  
545 study.

## 546 **Acknowledgements**

547 We extend our gratitude to all the participants involved in this study. Our sincere thanks to  
548 Akshay Kumar Avvaru and Deepak Kumar Kashyap for critically reviewing the manuscript and  
549 for informative discussions. We are grateful to Tulasi Nagabandi from CCMB NGS facility for  
550 library preparation and sequencing. We are thankful to Payel Mukherjee for demultiplexing the  
551 NGS data.

552

## 553 **References**

- 554 1. Mastana, S. S. Unity in diversity: an overview of the genomic anthropology of India. *Ann*  
555 *Hum Biol* **41**, 287–299 (2014).
- 556 2. Ruiz-Perez, V. L. *et al.* Mutations in a new gene in Ellis-van Creveld syndrome and Weyers  
557 acrorenal dysostosis. *Nat Genet* **24**, 283–286 (2000).
- 558 3. Evans, W. E. & Johnson, J. A. Pharmacogenomics: The Inherited Basis for Interindividual  
559 Differences in Drug Response. *Annual Review of Genomics and Human Genetics* **2**, 9–39  
560 (2001).
- 561 4. Hariprakash, J. M. *et al.* Pharmacogenetic landscape of DPYD variants in south Asian  
562 populations by integration of genome-scale data. *Pharmacogenomics* **19**, 227–241 (2018).
- 563 5. Nakatsuka, N. *et al.* The promise of discovering population-specific disease-associated genes  
564 in South Asia. *Nature genetics* **49**, 1403–1407 (2017).
- 565 6. Mastana, S. S. Unity in diversity: an overview of the genomic anthropology of India. *Ann*  
566 *Hum Biol* **41**, 287–299 (2014).

- 567 7. Tournebize, R., Chu, G. & Moorjani, P. Reconstructing the history of founder events using  
568 genome-wide patterns of allele sharing across individuals. *PLOS Genetics* **18**, e1010243  
569 (2022).
- 570 8. Lee, S. 'Steven'. README. (2023).
- 571 9. Nizamuddin, S. *et al.* CYP2C9 Variations and Their Pharmacogenetic Implications Among  
572 Diverse South Asian Populations. *Pharmacogenomics and Personalized Medicine* **14**, 135–  
573 147 (2021).
- 574 10. Krishnakumar, D. *et al.* Genetic polymorphisms of drug-metabolizing phase I enzymes  
575 CYP2E1, CYP2A6 and CYP3A5 in South Indian population. *Fundam Clin Pharmacol* **26**,  
576 295–306 (2012).
- 577 11. Kane, M. Atazanavir Therapy and UGT1A1 Genotype. in *Medical Genetics Summaries* (eds.  
578 Pratt, V. M. *et al.*) (National Center for Biotechnology Information (US), Bethesda (MD),  
579 2012).
- 580 12. Song, Y., Lim, H.-H., Yee, J., Yoon, H.-Y. & Gwak, H.-S. The Association between ABCG2  
581 421C>A (rs2231142) Polymorphism and Rosuvastatin Pharmacokinetics: A Systematic  
582 Review and Meta-Analysis. *Pharmaceutics* **14**, 501 (2022).
- 583 13. Toffoli, G. *et al.* Clinical validity of a DPYD-based pharmacogenetic test to predict severe  
584 toxicity to fluoropyrimidines. *Int J Cancer* **137**, 2971–2980 (2015).
- 585 14. Singh, O., Sandanaraj, E., Subramanian, K., Lee, L. H. & Chowbay, B. Influence of CYP4F2  
586 rs2108622 (V433M) on warfarin dose requirement in Asian patients. *Drug Metab*  
587 *Pharmacokinet* **26**, 130–136 (2011).
- 588 15. Tassaneeyakul, W. *et al.* Strong association between HLA-B\*5801 and allopurinol-induced  
589 Stevens-Johnson syndrome and toxic epidermal necrolysis in a Thai population.  
590 *Pharmacogenet Genomics* **19**, 704–709 (2009).
- 591 16. Leckband, S. G. *et al.* Clinical Pharmacogenetics Implementation Consortium guidelines for  
592 HLA-B genotype and carbamazepine dosing. *Clin Pharmacol Ther* **94**, 324–328 (2013).
- 593 17. Mallal, S. *et al.* Association between presence of HLA-B\*5701, HLA-DR7, and HLA-DQ3  
594 and hypersensitivity to HIV-1 reverse-transcriptase inhibitor abacavir. *The Lancet* **359**, 727–  
595 732 (2002).
- 596 18. Malaviya, A. N. Spondyloarthritis in India. *Indian Journal of Rheumatology* **15**, S2 (2020).
- 597 19. Thangaraj, K. *et al.* CAG Repeat Expansion in the Androgen Receptor Gene Is Not

- 598 Associated With Male Infertility in Indian Populations. *Journal of Andrology* **23**, 815–818  
599 (2002).
- 600 20. Gazal, S., Sahbatou, M., Babron, M.-C., Génin, E. & Leutenegger, A.-L. FSuite: exploiting  
601 inbreeding in dense SNP chip and exome data. *Bioinformatics* **30**, 1940–1941 (2014).
- 602 21. Nutile, T. *et al.* Whole-exome sequencing in the isolated populations of Cilento from South  
603 Italy. *Scientific Reports* **9**, 4059 (2019).
- 604 22. Curik, I., Ferenčaković, M. & Sölkner, J. Inbreeding and runs of homozygosity: A possible  
605 solution to an old problem. *Livestock Science* **166**, 26–34 (2014).
- 606 23. A global reference for human genetic variation. *Nature* **526**, 68–74 (2015).
- 607 24. Wall, J. D. *et al.* The GenomeAsia 100K Project enables genetic discoveries across Asia.  
608 *Nature* **576**, 106–111 (2019).
- 609 25. Liao, W.-W. *et al.* A draft human pangenome reference. *Nature* **617**, 312–324 (2023).
- 610 26. Mondal, M. *et al.* Genomic analysis of Andamanese provides insights into ancient human  
611 migration into Asia and adaptation. *Nature Genetics* **48**, 1066–1070 (2016).
- 612 27. Kausthubham, N. *et al.* A data set of variants derived from 1455 clinical and research  
613 exomes is efficient in variant prioritization for early-onset monogenic disorders in Indians.  
614 *Human mutation* **42**, e15–e61 (2021).
- 615 28. Ng, P. C. & Henikoff, S. SIFT: predicting amino acid changes that affect protein function.  
616 *Nucleic Acids Res* **31**, 3812–3814 (2003).
- 617 29. Adzhubei, I., Jordan, D. M. & Sunyaev, S. R. Predicting Functional Effect of Human  
618 Missense Mutations Using PolyPhen-2. *Curr Protoc Hum Genet* **0 7**, Unit7.20 (2013).
- 619 30. Rentzsch, P., Schubach, M., Shendure, J. & Kircher, M. CADD-Splice—improving genome-  
620 wide variant effect prediction using deep learning-derived splice scores. *Genome Medicine*  
621 **13**, 31 (2021).
- 622 31. Chun, S. & Fay, J. C. Identification of deleterious mutations within three human genomes.  
623 *Genome Res* **19**, 1553–1561 (2009).
- 624 32. Schwarz, J. M., Rödelsperger, C., Schuelke, M. & Seelow, D. MutationTaster evaluates  
625 disease-causing potential of sequence alterations. *Nat Methods* **7**, 575–576 (2010).
- 626 33. Capriotti, E., Fariselli, P. & Casadio, R. I-Mutant2.0: predicting stability changes upon  
627 mutation from the protein sequence or structure. *Nucleic Acids Res* **33**, W306–W310 (2005).
- 628 34. Xie, C. *et al.* Fast and accurate HLA typing from short-read next-generation sequence data

- 629 with xHLA. *Proceedings of the National Academy of Sciences* **114**, 8059–8064 (2017).
- 630 35. Gao, Z., Waggoner, D., Stephens, M., Ober, C. & Przeworski, M. An Estimate of the  
631 Average Number of Recessive Lethal Mutations Carried by Humans. *Genetics* **199**, 1243–  
632 1254 (2015).
- 633 36. Hsiao, T.-L. & Vitkup, D. Role of duplicate genes in robustness against deleterious human  
634 mutations. *PLoS genetics* **4**, e1000014 (2008).
- 635 37. Moscovitz, O. *et al.* A mutually inhibitory feedback loop between the 20S proteasome and  
636 its regulator, NQO1. *Molecular cell* **47**, 76–86 (2012).
- 637 38. Ortega, V. E. & Meyers, D. A. Pharmacogenetics: implications of race and ethnicity on  
638 defining genetic profiles for personalized medicine. *Journal of allergy and clinical*  
639 *immunology* **133**, 16–26 (2014).
- 640 39. Lamba, J., Hebert, J. M., Schuetz, E. G., Klein, T. E. & Altman, R. B. PharmGKB summary:  
641 very important pharmacogene information for CYP3A5. *Pharmacogenet Genomics* **22**, 555–  
642 558 (2012).
- 643 40. Jose, R. *et al.* CYP2C9 and CYP2C19 genetic polymorphisms: frequencies in the south  
644 Indian population. *Fundamental & Clinical Pharmacology* **19**, 101–105 (2005).
- 645 41. Cortes, A. *et al.* Identification of multiple risk variants for ankylosing spondylitis through  
646 high-density genotyping of immune-related loci. *Nat Genet* **45**, 730–738 (2013).
- 647 42. Haridas, V. *et al.* Human leukocyte Antigen-B\* 27 allele subtype prevalence and disease  
648 association of ankylosing spondylitis among south indian population. *Indian Journal of*  
649 *Rheumatology* **13**, 38–43 (2018).
- 650 43. Kumar, S. *et al.* Prevalence of HLA-B\*27 subtypes in the Tamil population of India with  
651 Ankylosing spondylitis and its correlation with clinical features. *Hum Immunol* **82**, 404–408  
652 (2021).
- 653 44. Reeves, E., Colebatch-Bourn, A., Elliott, T., Edwards, C. J. & James, E. Functionally distinct  
654 ERAP1 allotype combinations distinguish individuals with Ankylosing Spondylitis.  
655 *Proceedings of the National Academy of Sciences* **111**, 17594–17599 (2014).
- 656 45. Brown, M. A. *et al.* Susceptibility to ankylosing spondylitis in twins the role of genes, HLA,  
657 and the environment. *Arthritis & Rheumatism* **40**, 1823–1828 (1997).
- 658
- 659

660 **Figures**

661

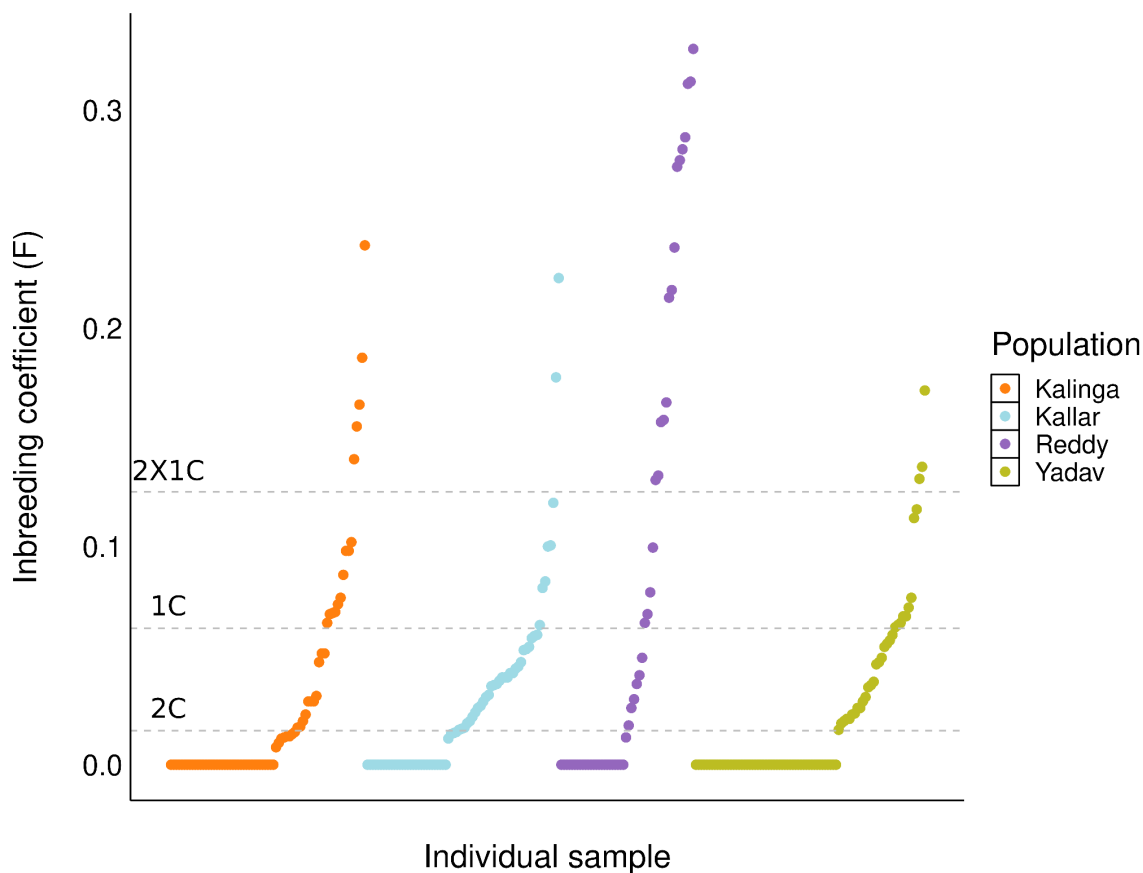

662

663

664 **Fig. 1: Proportion of inbred individuals across groups.** The mating type inference for each  
665 individual was done. The gray lines indicate the inbreeding coefficient values for first cousins  
666 (1C), second cousins (2C) and double-first cousins (2x1C). A high level of inbreeding (~59%)  
667 was detected across the four populations.



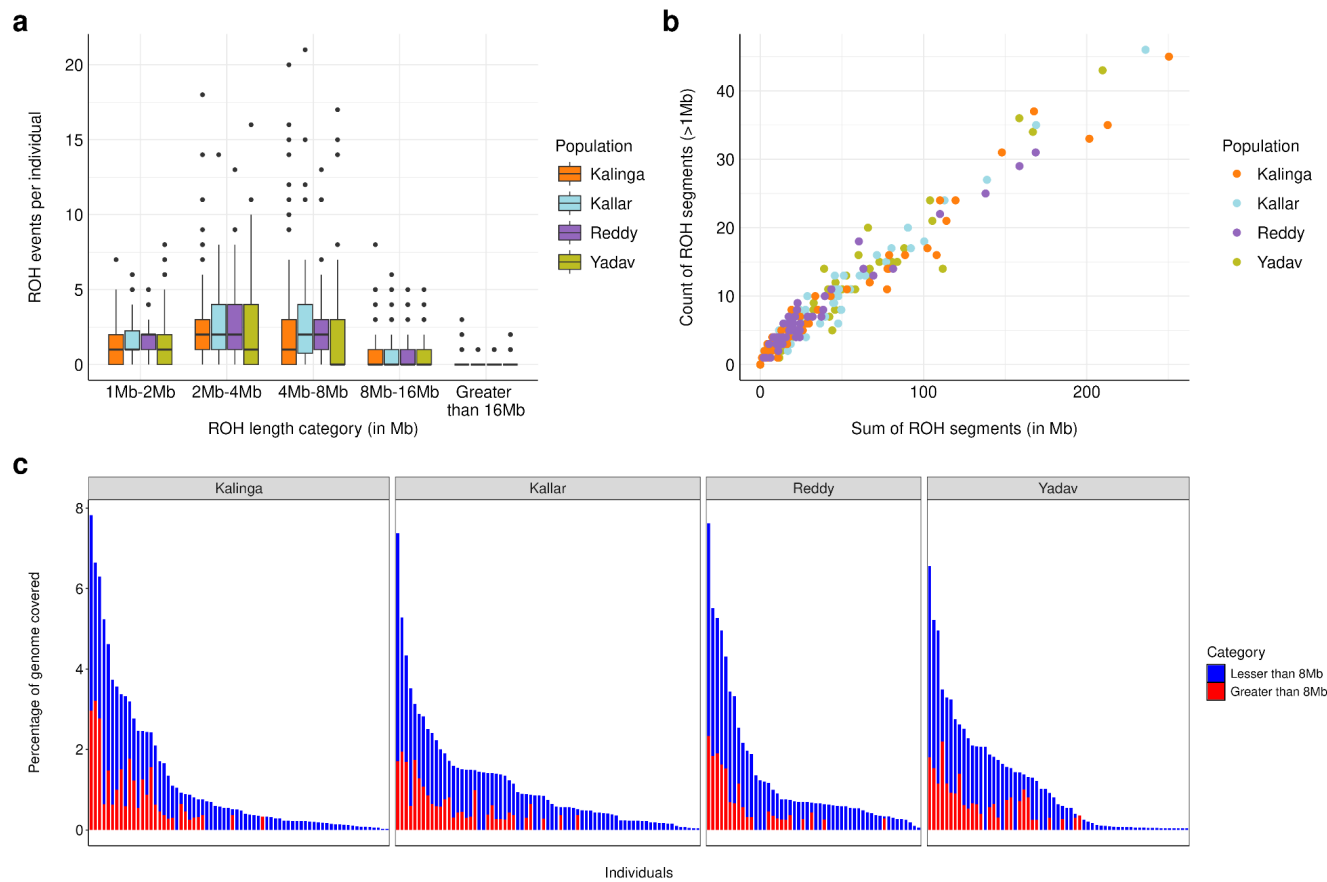

668  
669

670 **Fig. 2: a) ROH segments across the populations.** ROH regions spanning greater than 1Mb  
671 genomic region are considered to be significant and were distributed into five classes based on  
672 the length– class A (1-2Mb), class B (2-4Mb), class C (4-8Mb), class D (8-16Mb) and class E  
673 (>16Mb). **b) Relationship between the number and the sum of ROH segments per**  
674 **individual across the four population groups.** **c) Proportion of genome covered by ROH**  
675 **regions below 8Mb (1-8Mb) and above 8Mb.** A high proportion of genome occupied by ROHs  
676 in both categories indicates the presence of both founder events and recent inbreeding in the  
677 groups.

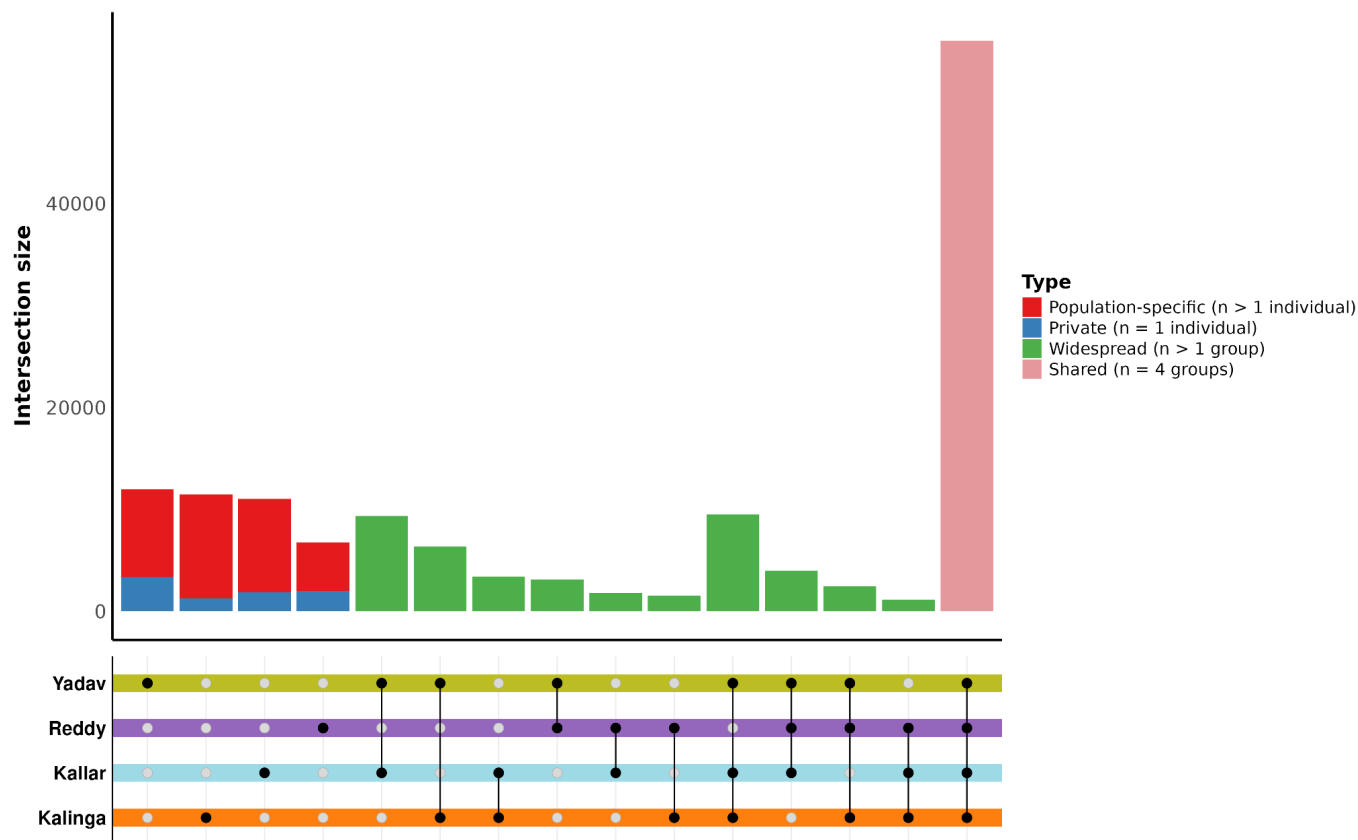

678  
679

680 **Fig. 3: Upset plot showing the distribution of community-specific variants, and variants**  
681 **shared among the groups.** Variants were classified as private (n=1 individual), population-  
682 specific (n>1 individual in a group), widespread (n>1 individual in more than one group) or  
683 shared (n>1 individual in all four groups). Around ~ 29.2% of the total variants across all the  
684 four groups were found in just a single individual or population (population-specific), while  
685 39.7% variants were shared by all the four populations.

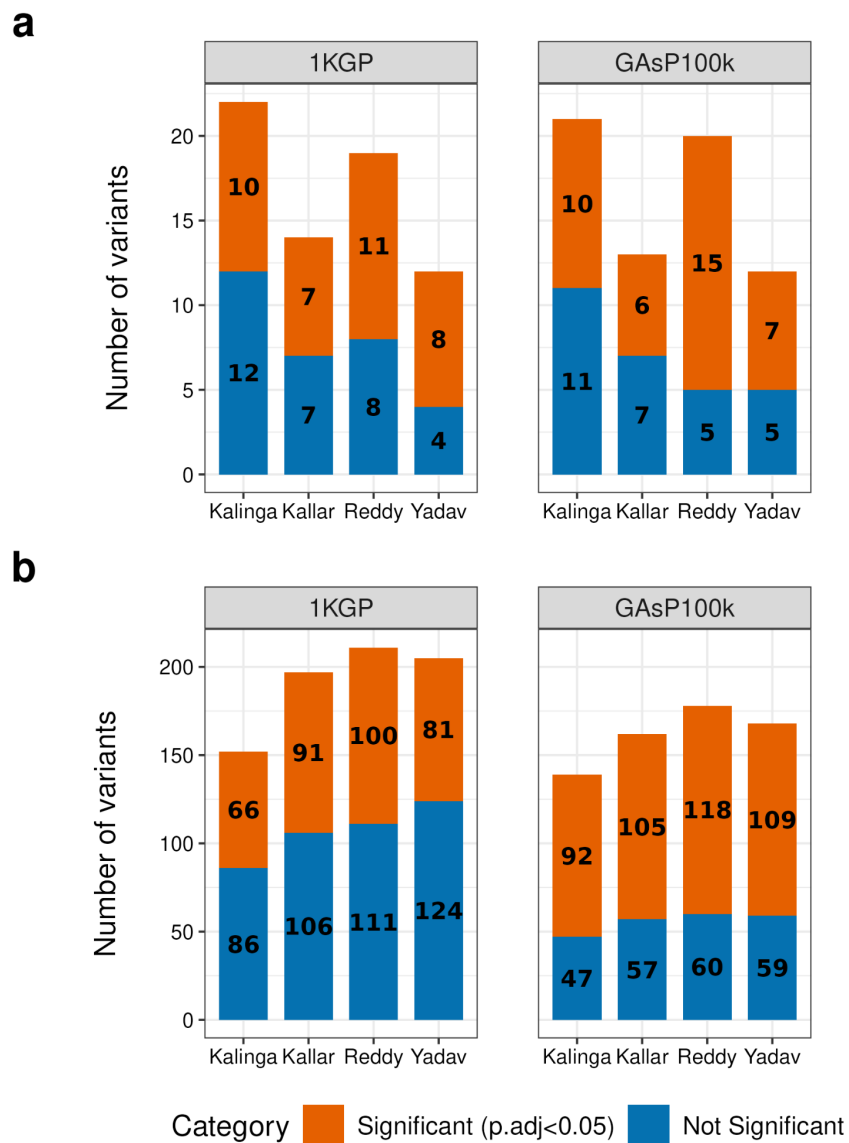

686

687 **Fig. 4: Significant known deleterious and known potentially deleterious variants across**  
 688 **groups.** The known variants categorized in the (a) deleterious and (b) potentially deleterious  
 689 types across groups were assessed for the significance of the allele frequencies in comparison to  
 690 those reported in 1000 Genome phase 3 dataset (left panel) and the GenomeAsia 100k dataset  
 691 (right panel). Significance was determined using Fisher's exact test followed by BH-correction  
 692 for accuracy. The ones not reported in either of the datasets are omitted.

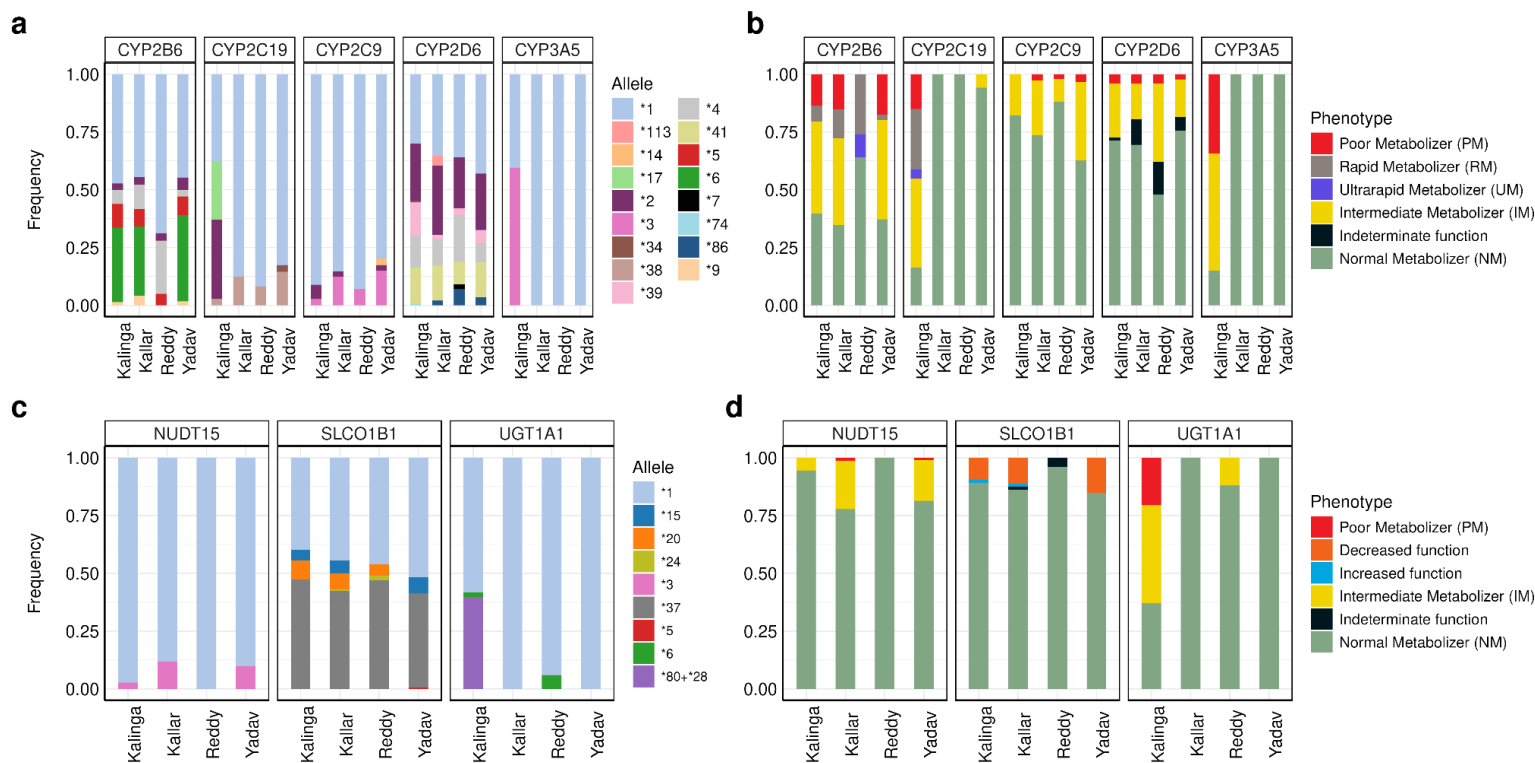

694

695 **Fig. 5: Genetic diversity and type of drug-metabolism for the PharmGKB VIP genes across**  
 696 **groups.** (a) and (b) focus on a few CYP450 genes, where they represent the allele frequency and  
 697 the proportion of different types of metabolizers corresponding to the genotype of the individual,  
 698 respectively. Similarly, (c) and (d) are for the non-cytochrome P450 genes. The diploid genotype  
 699 of an individual determines the activity levels of the drug metabolizer protein.

### Proportion of inbred and outbred individuals in the groups

| Group   | Total samples | Outbred (%) | Inbred (%) |      |      |
|---------|---------------|-------------|------------|------|------|
|         |               |             | 1C         | 2C   | 1X2C |
| Kalinga | 73            | 43.8        | 13.7       | 31.5 | 11   |
| Kallar  | 72            | 12.5        | 11.1       | 69.4 | 6.9  |
| Reddy   | 50            | 44          | 6          | 18   | 32   |
| Yadav   | 86            | 61.6        | 17.4       | 15.8 | 5.8  |

ROH statistics across groups

| Population | Mean ROH number per individual | SD   | Mean ROH length per individual | SD   |
|------------|--------------------------------|------|--------------------------------|------|
| Kalinga    | 7.79                           | 9.6  | 3.71                           | 1.83 |
| Kallar     | 8.86                           | 8.15 | 6.23                           | 2.84 |
| Reddy      | 8.6                            | 6.67 | 6.06                           | 2.45 |
| Yadav      | 6.52                           | 9.39 | 4.12                           | 3.74 |

Table 3

| Position       | Gene   | REF | ALT | AltHetCount | Novel variants predicted to be deleterious along with their impact on protein stability |             |                                                 | Consequence type | Population                                                                                                                                                                                                         | Gene Function                                                                                  | Associated Disorders | $\Delta\Delta G$ |
|----------------|--------|-----|-----|-------------|-----------------------------------------------------------------------------------------|-------------|-------------------------------------------------|------------------|--------------------------------------------------------------------------------------------------------------------------------------------------------------------------------------------------------------------|------------------------------------------------------------------------------------------------|----------------------|------------------|
|                |        |     |     |             | AltHomCount                                                                             | RefHomCount |                                                 |                  |                                                                                                                                                                                                                    |                                                                                                |                      |                  |
| chr1:223762229 | CAPN2  | T   | C   | 9           | 0                                                                                       | 64          | missense variant                                | Kalinga          | calcium-activated intracellular cysteine proteases, are nonlysosomal                                                                                                                                               | lethality, muscular dystrophies, gastropathy (IBD) and diabetes                                | -2.23                |                  |
| chr3:157159829 | CCNL1  | A   | G   | 7           | 0                                                                                       | 65          | missense variant                                | Kalinga          | cyclin-dependent protein serine/threonine kinase regulation of transcription by RNA polymerase II                                                                                                                  | Neuropathies, Tarsal Tunnel Syndrome                                                           | -0.94                |                  |
| chr20:47663089 | SULF2  | A   | C   | 6           | 0                                                                                       | 67          | missense variant                                | Kalinga          | Exhibits arylsulfatase activity and highly specific endoglucosamine-6-sulfatase activity                                                                                                                           | Loss of arylsulfatase activity                                                                 | -1.91                |                  |
| chr2:71077557  | NAGK   | G   | T   | 4           | 0                                                                                       | 69          | splice_acceptor_variant,N MD_transcript_variant | Kalinga          | encodes a member of the N-acetylhexosamine kinase family. Catalyzes the conversion of N-acetyl-D-glucosamine to N-acetyl-D-glucosamine 6-phosphate, and is the major mammalian enzyme which recovers amino sugars. | Nonaka myopathy, Sialuria                                                                      |                      |                  |
| chr2:219541663 | CHPF   | G   | T   | 4           | 0                                                                                       | 69          | missense variant                                | Kalinga          | Involved in chondroitin sulfate biosynthetic process.                                                                                                                                                              | Spondyloepimetaphyseal Dysplasia with congenital Joint Dislocations                            | -2.03                |                  |
| chr8:67093541  | CSPP1  | A   | G   | 4           | 0                                                                                       | 69          | splice_acceptor_variant,N MD_transcript_variant | Kalinga          | cell-cycle-dependent microtubule organization.                                                                                                                                                                     | Joubert Syndrome, Meckel Syndrome 1                                                            |                      |                  |
| chr14:95535366 | GLRX5  | G   | T   | 3           | 0                                                                                       | 70          | missense variant                                | Kalinga          | Monothiol glutaredoxin involved in mitochondrial iron-sulfur (Fe/S) cluster transfer                                                                                                                               | Sideroblastic Anemia, Spasticity with childhood onset                                          | -0.47                |                  |
| chr2:3519367   | ADI1   | C   | A   | 3           | 0                                                                                       | 69          | splice_donor_variant                            | Kallar           | encodes an enzyme that belongs to the acireductone dioxygenase family of metal-binding enzymes, which are involved in methionine salvage.                                                                          | Charcot-Marie-Tooth Disease, Lebe Optic Atrophy and Dystonia                                   |                      |                  |
| chr2:9990727   | GRHL1  | G   | A   | 3           | 0                                                                                       | 69          | missense variant                                | Kallar           | Transcription factor involved in epithelial development.                                                                                                                                                           | Deafness, Autosomal dominant; Maxillary/Jaw cancer                                             | -1.42                |                  |
| chr4:8080688   | ABLIM2 | T   | C   | 3           | 0                                                                                       | 69          | missense variant                                | Kallar           | Predicted to enable actin filament binding activity.                                                                                                                                                               |                                                                                                | -0.65                |                  |
| chr15:75607298 | SNUPN  | T   | C   | 3           | 0                                                                                       | 69          | missense variant                                | Kallar           | Involved in the trimethylguanosine (m3G)-cap-dependent nuclear import of U snRNPs. No paralogs                                                                                                                     |                                                                                                | -3.23                |                  |
| chr20:45843560 | ACOT8  | A   | G   | 4           | 0                                                                                       | 46          | missense variant                                | Reddy            | Catalyzes the hydrolysis of acyl-CoAs into free fatty acids and coenzyme A .                                                                                                                                       | Non-syndromic X-linked Intellectual Disability, Hypotrichosis 1, Zellweger syndrome            | 1.05                 |                  |
| chr6:53795353  | LRRC1  | C   | T   | 3           | 0                                                                                       | 47          | missense variant                                | Reddy            |                                                                                                                                                                                                                    | Intellectual developmental disorder with short stature and behavioural abnormalities, epilepsy | -1.37                |                  |

Table 3

|                |         |   |   |   |   |    |                                                |       |                                                                                                                                                                                                                       |                                                                 |       |
|----------------|---------|---|---|---|---|----|------------------------------------------------|-------|-----------------------------------------------------------------------------------------------------------------------------------------------------------------------------------------------------------------------|-----------------------------------------------------------------|-------|
| chr17:4952890  | ENO3    | G | A | 3 | 0 | 47 | missense_variant,splice_region_variant         | Reddy | Glycolytic enzyme catalyzing conversion of 2-phosphoglycerate to phosphoenolpyruvate. Functions in striated muscle development and regeneration.                                                                      | Glycogen Storage Disease                                        | -1.47 |
| chr1:1926894   | CFAP74  | C | G | 2 | 0 | 48 | missense_variant,splice_region_variant         | Reddy | As part of the central apparatus of the cilium axoneme may play a role in cilium movement. May play an important role in sperm architecture and function.                                                             | Ciliary Dyskinesia, Primary, 49                                 | -1.41 |
| chr1:19327226  | SLC66A1 | G | T | 2 | 0 | 48 | splice_acceptor_variant,NMD_transcript_variant | Reddy | Amino acid transporter that specifically mediates the pH-dependent export of the cationic amino acids from lysosomes.                                                                                                 | Gallbladder Papillomatosis, Fanconi Syndrome, Cystinosis        |       |
| chr2:232523058 | PRSS56  | A | G | 2 | 0 | 48 | splice_acceptor_variant                        | Reddy | Serine protease required during eye development.                                                                                                                                                                      | Microphthalmia, Isolated                                        |       |
| chr3:50348764  | NPRL2   | C | T | 2 | 0 | 48 | missense variant                               | Reddy | Part of GATOR1 complex, a multiprotein complex that functions as an inhibitor of the amino acid-sensing branch of the mTORC1 pathway.                                                                                 | Epilepsy, Familial Focal; Newborn Respiratory Distress Syndrome | -1.16 |
| chr11:62790834 | TMEM223 | A | C | 2 | 0 | 48 | missense variant                               | Reddy | Mitochondrial ribosome-associated protein involved in the first steps of cytochrome c oxidase complex (complex IV) biogenesis                                                                                         | Raynaud-Claes Syndrome, Syndromic Intellectual Disability       | -4.84 |
| chr19:38601443 | MAP4K1  | T | A | 2 | 0 | 48 | missense variant                               | Reddy | Serine/threonine-protein kinase, which may play a role in the response to environmental stress                                                                                                                        | Melnick-Needles Syndrome                                        | 0.02  |
| chr12:52489942 | KRT6A   | C | T | 4 | 0 | 82 | splice_donor_variant                           | Yadav | Epidermis-specific type I keratin involved in wound healing. Involved in the activation of follicular keratinocytes after wounding                                                                                    | Pachyonychia Congenita 3/1                                      |       |
| chr17:27301871 | WSB1    | T | G | 4 | 0 | 82 | missense variant                               | Yadav | Probable substrate-recognition component of a SCF-like ECS (Elongin-Cullin-SOCS-box protein) E3 ubiquitin ligase complex which mediates the ubiquitination and subsequent proteasomal degradation of target proteins. | Deafness, Autosomal Recessive                                   | -2.25 |
| chr19:40780052 | RAB4B   | C | T | 4 | 0 | 82 | missense variant                               | Yadav | Small GTPase which cycles between an active GTP-bound and an inactive GDP-bound state (By similarity). Protein transport. Probably involved in vesicular traffic                                                      |                                                                 | -0.28 |



Table 4

Details of VIP gene variants from PharmGKB across groups

| Risk allele | Gene    | Phenotype                           | No. of risk alleles in the genotyped individuals (%) |        |       |       |
|-------------|---------|-------------------------------------|------------------------------------------------------|--------|-------|-------|
|             |         |                                     | Kalinga                                              | Kallar | Reddy | Yadav |
| rs1051266   | SLC19A1 | Arthritis, Rheumatoid               | 69.18                                                | 70.14  | 53    | 59.3  |
| rs1801133   | MTHFR   | Arthritis, Rheumatoid               | 8.22                                                 | 8.33   | 7     | 11.05 |
| rs3918290   | DPYD    | PM                                  | –                                                    | –      | 3     | –     |
| rs1801160   | DPYD    | Neoplasms                           | 4.79                                                 | 15.97  | 7     | 6.4   |
| rs1801265   | DPYD    | Neoplasms                           | 17.12                                                | 27.78  | –     | 27.91 |
| rs56038477  | DPYD    | Neoplasms                           | –                                                    | –      | –     | 2.33  |
| rs2297595   | DPYD    | Neoplasms                           | 6.85                                                 | 4.17   | 11.46 | 13.37 |
| rs1801159   | DPYD    | Neoplasms                           | 6.16                                                 | 9.72   | –     | 8.14  |
| rs2108622   | CYP4F2  | Increased warfarin dose requirement | 46.58                                                | 45.83  | –     | 50.58 |
| rs2231142   | ABCG2   | Rosuvastatin toxicity               | 17.81                                                | 12.5   | 10.2  | 7.56  |
| rs116855232 | NUDT15  | dosage; IBD, myelosuppression       | 2.74                                                 | 11.81  | –     | 9.88  |
| rs2242480   | CYP3A4  | pain, postoperative                 | 41.78                                                | –      | –     | –     |
| rs3745274   | CYP2B6  | HIV infections                      | 33.56                                                | 34.03  | –     | 38.95 |
| rs4149056   | SLCO1B1 | Statin-related myopathy             | 4.79                                                 | 5.56   | –     | 4.65  |
| rs9923231   | VKORC1  | Higher warfarin sensitivity         | –                                                    | –      | –     | –     |
| rs6025      | F5      | Thrombosis                          | –                                                    | 2.08   | –     | –     |
| CYP2B6*6    | CYP2B6  | Decreased function                  | 25.34                                                | 22.22  | –     | 27.84 |
| CYP2B6*9    | CYP2B6  | Decreased function                  | 1.37                                                 | 4.17   | –     | 1.7   |
| CYP2B6*4    | CYP2B6  | Increased function                  | 6.16                                                 | 10.42  | 18    | 2.84  |
| CYP2C9*3    | CYP2C9  | No function                         | 2.74                                                 | 16.67  | 6     | 13.64 |
| CYP2C9*2    | CYP2C9  | Decreased function                  | 6.16                                                 | 2.78   | –     | 2.27  |
| CYP2C19*3   | CYP2C19 | No function                         | 2.74                                                 | 11.11  | –     | 15.34 |
| CYP2C19*2   | CYP2C19 | No function                         | 26.71                                                | –      | –     | –     |
| CYP2C19*17  | CYP2C19 | Increased function                  | 23.29                                                | –      | –     | –     |
| CYP2D6*3    | CYP2D6  | No function                         | 13.7                                                 | 2.08   | 3     | 20.45 |
| CYP2D6*4    | CYP2D6  | No function                         | 23.29                                                | 20.83  | 25    | 5.11  |
| CYP2D6*41   | CYP2D6  | Decreased function                  | 13.7                                                 | 13.19  | 10    | 12.5  |
| CYP3A5*3    | CYP3A5  | No function                         | 42.47                                                | –      | –     | –     |
| NUDT15*3    | NUDT15  | No function                         | 2.74                                                 | 11.11  | –     | 9.09  |
| UGT1A1*6    | UGT1A1  | Decreased function, PM              | 2.05                                                 | –      | 6     | –     |
| HLA-B*15:02 | HLA-B   | Increased risk of SCAR              | 4.79                                                 | 2.08   | 1     | 1.7   |
| HLA-B*57:01 | HLA-B   | Increased risk of SCAR              | 11.64                                                | 9.72   | 3     | 9.66  |
| HLA-B*58:01 | HLA-B   | Increased risk of SCAR              | 4.11                                                 | 1.39   | 3     | 1.7   |

Table 5

List of ERAP1 allotypes in the AS-positive samples

Amino acid composition at each SNP

| Sample | rs3734016<br>(E56K) | rs26653<br>(R127P) | rs26618<br>(I276M) | rs2287987<br>(M349V) | rs30187<br>(K528R) | rs10050860<br>(D575N) | rs17482078<br>(R725Q) | rs27044<br>(Q730E) |
|--------|---------------------|--------------------|--------------------|----------------------|--------------------|-----------------------|-----------------------|--------------------|
| AS1    | E                   | P                  | I                  | V                    | K                  | N                     | Q                     | E                  |
| AS2    | E                   | P                  | M                  | M                    | K                  | D                     | R                     | E                  |
| AS3    | E                   | P                  | I                  | V                    | K                  | N                     | Q                     | E                  |
| AS4    | E                   | P                  | I                  | M                    | K                  | D                     | R                     | E                  |
| AS5    | E                   | R                  | I                  | M                    | K                  | D                     | R                     | E                  |
| AS6    | E                   | P                  | I                  | M                    | K                  | D                     | R                     | E                  |
| AS7    | E                   | P                  | M                  | M                    | K                  | D                     | R                     | E                  |

\*AS – Ankylosing  
Spondylitis , 1 -7 are  
the 7 positive  
samples
